# Supplementary material for: Promoted thermoelectric performance in cubic-phase GeTe via grain-boundary phase elimination under phase diagram guidance
Source: Royal Society of Chemistry journal article supplement (doi:10.1039/d4ee03090g), 2024-01-01
Supplement: d4ee03090g1.pdf [file d4ee03090g1.pdf]

## Supporting Information

### Promoted thermoelectric performance in cubic-phase GeTe *via* grain-boundary phase elimination under phase diagram guidance

Fudong Zhang, ‡<sup>a</sup> Baopeng Ma, ‡<sup>a</sup> Yiyuan Luo, ‡<sup>b</sup> Lujun Zhu, \*<sup>c</sup> Weishuai Wang, <sup>a</sup> Yalin Shi, <sup>a</sup> BeiQuan Jia, <sup>a</sup> Zhen-Hua Ge, <sup>d</sup> Zupei Yang, <sup>a</sup> Di Wu \*<sup>a</sup> and Jiaqing He \*<sup>b,e</sup>

<sup>a</sup> Key Laboratory for Macromolecular Science of Shaanxi Province, School of Materials Science and Engineering, Shaanxi Normal University, Xi'an 710062, China

<sup>b</sup> Shenzhen Key Laboratory of Thermoelectric Materials, Department of Physics, Southern University of Science and Technology, Shenzhen 518055, China

<sup>c</sup> School of Physics and Information Technology, Shaanxi Normal University, Xi'an 710119, China

<sup>d</sup> Faculty of Materials Science and Engineering, Kunming University of Science and Technology, Kunming 650093, China

<sup>e</sup> Guangdong Provincial Key Laboratory of Advanced Thermoelectric Materials and Device Physics, Southern University of Science and Technology, Shenzhen 518055, China.

† Electronic supplementary information (ESI) available.

‡ These authors contributed equally to this work.

\*Corresponding authors: E-mails: wud@snnu.edu.cn, hejq@sustech.edu.cn, zhulujun@snnu.edu.cn

## Experimental details

### Materials fabrication:

Ge (pieces, 99.99 %), Te (particle, 99.99 %), Ag (chunks, 99.99 %) and Sb (granules, 99.99 %) were used as raw materials to synthesize  $(\text{GeTe})_x(\text{Ag}_{0.8}\text{Sb}_{1.2}\text{Te}_{2.2})_{100-x}$  ( $x = 75, 76, 77, 78, 79$ ) and  $(\text{GeTe})_{78}(\text{Ag}_{1-\delta}\text{Sb}_{1+\delta}\text{Te}_{2+\delta})_{22}$  ( $\delta = 0.2, 0.21, 0.22, 0.23, 0.24$ ) (written as:  $\delta$ -TAGS-78) utilizing melting and quenching method. These mixtures were load into evacuated quartz tubes and encapsulated with  $10^{-4}$  Pa, following put into the furnace and heated up to 1173K in 12 h and kept there for 12 hours before being quenched in water. Then, the as-obtained ingots were annealed at 773 K for 24 h. After that, the obtained ingots were hand-ground into powders in agate mortar, then poured into a  $\phi 15$  mm graphite die and sintered using spark plasma sintering (SPS) method (Sinter Land INC, Japan) under 50 MPa and 723K in vacuum ( $< 6$  Pa) for 5min.

The obtained bulk samples were cut into a block with cross section of  $3 \times 3 \times 12$  mm<sup>3</sup> for electrical transport measurements and  $6 \times 6 \times 2$  mm<sup>3</sup> for thermal diffusion coefficient ( $D$ ) measurements.

### Thermoelectric properties measurements:

The commercial ZEM-3 apparatus (Ulvac-Riko, Japan) was performed to measure the Seebeck coefficient and electrical conductivity under dilute helium atmosphere. The uncertainties of measurements were estimated to be about 5%. The thermal conductivity  $\kappa$  was calculated *via*  $\kappa = D C_p \rho$ , where  $D$  is thermal diffusivity coefficient can be obtained using the LFA-467 (Netzsch, Germany) laser flash under nitrogen atmosphere,  $\rho$  is the mass density measured using the Archimedes method (Mettler Toledo, Model XSE105DU), and  $C_p$  is the heat capacity which was estimated by the Dulong-Petit limit. The uncertainty of thermal conductivity was estimated to be about 7%. The electronic thermal conductivity ( $\kappa_{\text{ele}}$ ) was calculated according to Wiedemann-Franz law:  $\kappa_{\text{ele}} = \sigma L T$ , where the Lorenz factor ( $L$ ) was roughly calculated by the equation:  $L = 1.5 + \exp(-|S|/116)$ .<sup>[1]</sup> Considering the uncertainties of all the parameters, the uncertainty of the calculated  $ZT$  was about 13%. Room temperature carrier concentration and carrier mobility were measured with Van der Pauw method (Lake Shore 8400 Series, Model 8404, USA), with an uncertainty of about 10%.

### Structural characterization

Powder X-ray diffraction using a diffractometer (MiniFlex600, Rigaku, Tokyo, Japan) was

conducted to analyze the crystal structures. With Cu K $\alpha$  radiation ( $\lambda = 1.5418 \text{ \AA}$ , 40 kV, 40 mA), while the scanning rate of  $10^\circ \text{ min}^{-1}$  from  $2\theta = 20^\circ$  to  $80^\circ$ .

Transmission electron microscopy (TEM), Cs-corrected high-angle angular dark field-scanning transmission electron microscopy (HAADF-STEM) and energy dispersive X-ray mapping (EDX) experiments were performed using a FEI Titan Themis 60-300 kV microscope equipped with a Super-X detector and operating at 300 kV.

### **Mechanical properties**

The Vickers hardness and Young's modulus were measured through a nano-indentation technique (iMicro KLA, USA).

The temperature-dependent relative length variation was measured on a thermal dilatometer (DIL 402 Expedis Supreme, Netzsch), where the slope of corresponding curves indicates the coefficient of thermal expansion.

### **Weighted mobility**

The temperature-dependent weighted mobility ( $\mu_w$ ) was derived from the experimental electrical conductivity  $\sigma$  and Seebeck coefficient  $S$  proposed by G. J. Snyder et al:<sup>[2]</sup>

$$\mu_w = 331 \left(\frac{1}{\rho}\right) \left(\frac{1}{300}\right)^{-\frac{3}{2}} \left[ \frac{\exp\left[\frac{|S|}{k_B/e} - 2\right]}{1 + \exp\left[-5\left(\frac{|S|}{k_B/e} - 1\right)\right]} + \frac{\frac{3}{\pi^2} \frac{|S|}{k_B/e}}{1 + \exp\left[5\left(\frac{|S|}{k_B/e} - 1\right)\right]} \right]$$

where  $\mu_w$  is the weighted mobility,  $\rho$  is the electrical resistivity measured in  $\text{m}\Omega \text{ cm}$ ,  $T$  is the absolute temperature in K,  $S$  is the Seebeck coefficient, and  $k_B/e = 86.3 \text{ } \mu\text{V K}^{-1}$ .

### **Thermoelectric generator fabrication**

The thermoelectric power generator (TEG) with an overall size of  $20 \times 20 \text{ mm}^2$ , in which composed of eight-pair of  $p$ -type legs  $(\text{GeTe})_{78}(\text{Ag}_{0.77}\text{Sb}_{1.23}\text{Te}_{2.23})_{22}$  and  $n$ -types leg  $\text{Pb}_{0.985}\text{Sb}_{0.015}\text{Te}$ . The SPS-sintered  $p$ - and  $n$ -type bulk was cut into thermoelectric legs with geometric dimensions sizes of  $\sim 3.5 \times 3.5 \text{ mm}^2$ , and Ni as a diffusion barrier material was electroplated to the as-obtained legs. The TEG was assembled with soldering the thermoelectric pairs onto a copper-clad plate at the hot side using tin-based high-temperature solder, whereas directly bonding a copper substrate at the cold side. The TEG performance is characterized by a commercial instrument (PEM-2, Riko), with the cold-side temperature is fixed at 293 K and

the hot-side temperature is varied from 473 K to 773 K. The asbestos blanket was further used as heat insulator to reduce the radiant heat.

### Supporting Figures

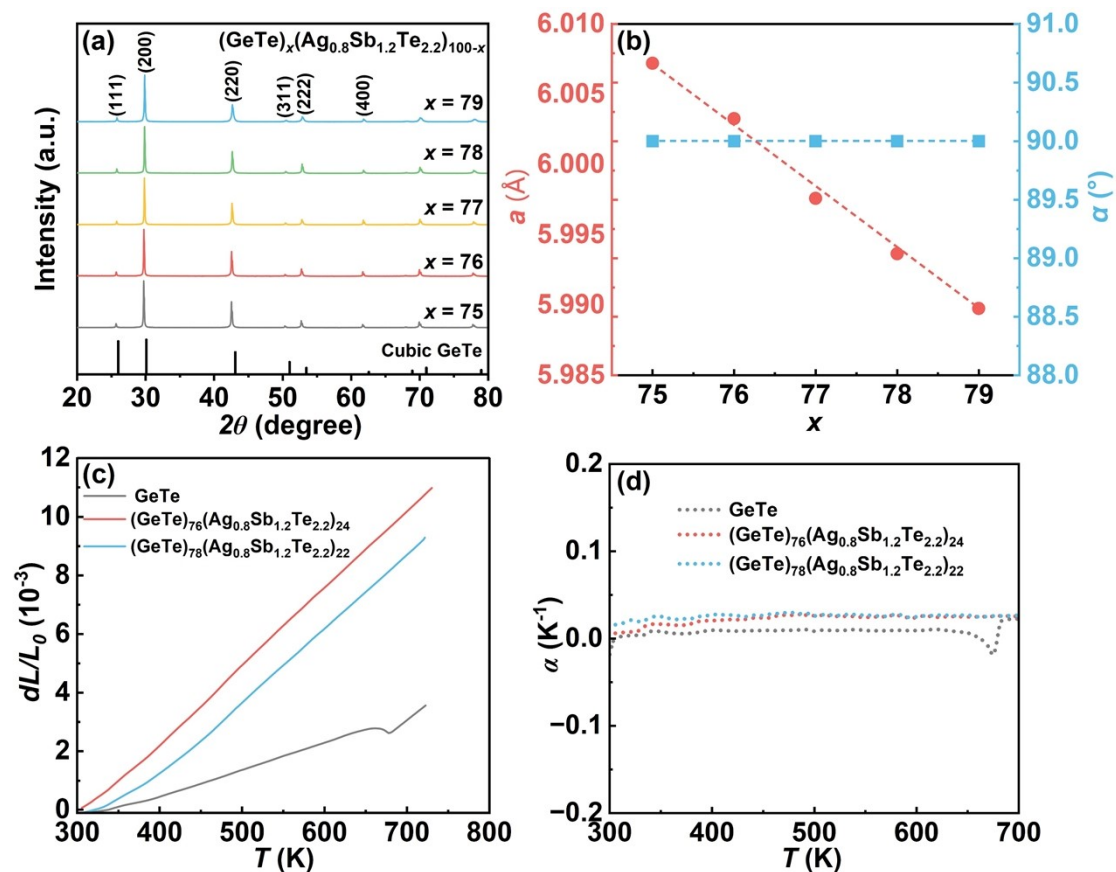

**Figure S1** (a) Room-temperature powder XRD patterns, (b) calculated lattice parameters and interaxial angles  $\alpha$  of  $(\text{GeTe})_x(\text{Ag}_{0.8}\text{Sb}_{1.2}\text{Te}_{2.2})_{100-x}$  ( $x = 75, 76, 77, 78, 79$ ). (c) Temperature-dependent thermal expansion rate ( $dL/L_0$ ), and (d) calculated coefficient of thermal expansion for  $x = 76, 78$  ( $\delta = 0.2$ ) as compared with pristine GeTe.

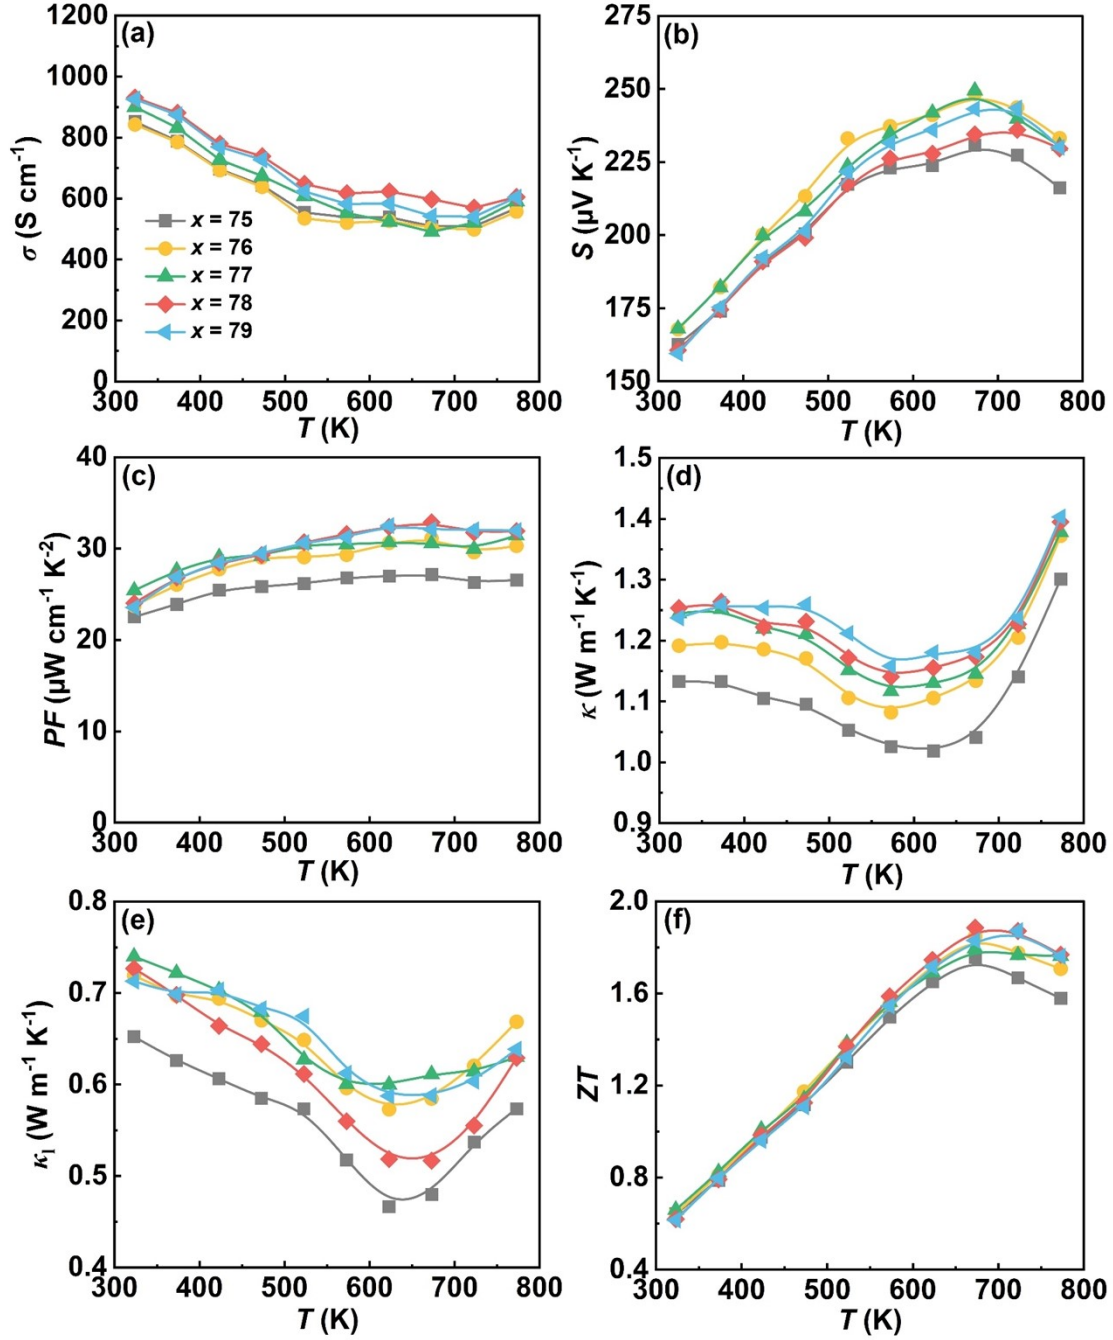

**Figure S2** Thermoelectric properties of  $(\text{GeTe})_x(\text{Ag}_{0.8}\text{Sb}_{1.2}\text{Te}_{2.2})_{100-x}$  ( $x = 75, 76, 77, 78, 79$ ). Temperature-dependent (a) electrical conductivity, (b) Seebeck coefficient, (c) power factor, (d) total thermal conductivity, (e) lattice thermal conductivity and (e)  $ZT$  values.

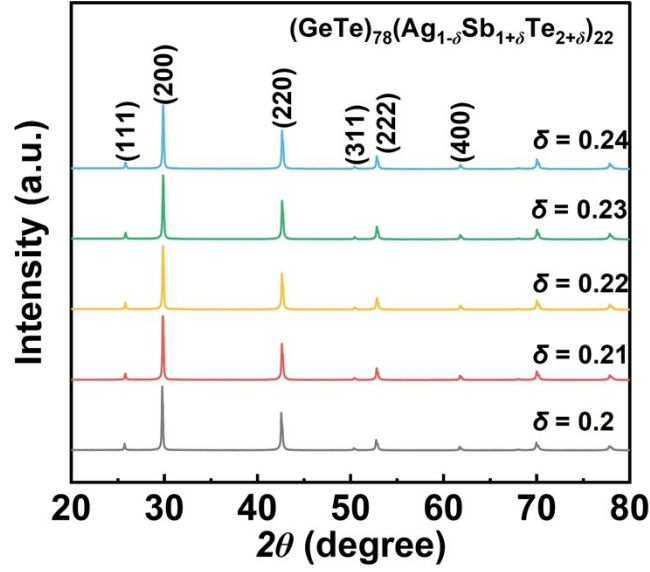

**Figure S3** Room-temperature powder XRD patterns of  $(\text{GeTe})_{78}(\text{Ag}_{1-\delta}\text{Sb}_{1+\delta}\text{Te}_{2+\delta})_{22}$  ( $\delta = 0.2, 0.21, 0.22, 0.23, 0.24$ ).

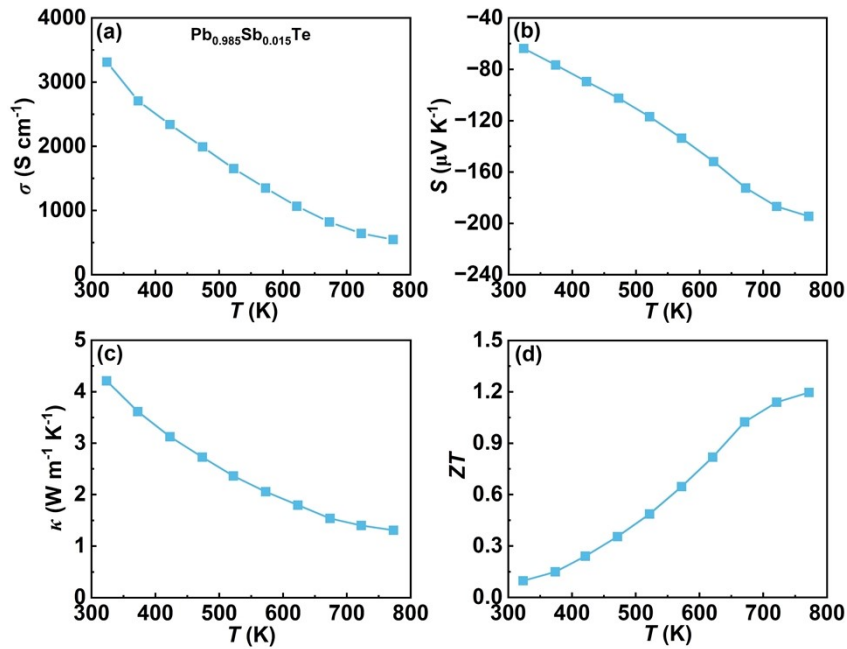

**Figure S4** Thermoelectric properties of  $n$ -type  $\text{Pb}_{0.985}\text{Sb}_{0.015}\text{Te}$ . Temperature-dependent (a) electrical conductivity, (b) Seebeck coefficient, (c) total thermal conductivity, and (d)  $ZT$  value.

## References

- [1] H. S. Kim, Z. M. Gibbs, Y. Tang, H. Wang and G. J. Snyder, *APL Mater.*, 2015, **3**, 041506.
- [2] G. J. Snyder, A. H. Snyder, M. Wood, R. Gurunathan, B. H. Snyder, and C. Niu, *Adv. Mater.*, 2020, **32**, 2001537.
